# Supplementary material for: Assessing the Feasibility and Acceptability of Health Coaching as a New Diabetes Management Approach for the People with Type 2 Diabetes in Saudi Arabia: A Protocol for a Mixed Methods Feasibility Study
Source: MDPI journal article supplement (doi:10.3390/ijerph192215089), 2022-11-16
Supplement: s1 [file s1]

## Supplementary File S1

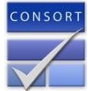

## CONSORT 2010 checklist of information to include when reporting a pilot or feasibility trial[\[31\]](#)

| Section/Topic             | Item No | Checklist item                                                                                                                                               | Reported on page No |
|---------------------------|---------|--------------------------------------------------------------------------------------------------------------------------------------------------------------|---------------------|
| <b>Title and abstract</b> |         |                                                                                                                                                              |                     |
|                           | 1a      | Identification as a pilot or feasibility randomised trial in the title                                                                                       | 1                   |
|                           | 1b      | Structured summary of pilot trial design, methods, results, and conclusions (for specific guidance see CONSORT abstract extension for pilot trials)          | 1                   |
| <b>Introduction</b>       |         |                                                                                                                                                              |                     |
| Background and objectives | 2a      | Scientific background and explanation of rationale for future definitive trial, and reasons for randomised pilot trial                                       | 2–4                 |
|                           | 2b      | Specific objectives or research questions for pilot trial                                                                                                    | 4                   |
| <b>Methods</b>            |         |                                                                                                                                                              |                     |
| Trial design              | 3a      | Description of pilot trial design (such as parallel, factorial) including allocation ratio                                                                   | 4                   |
|                           | 3b      | Important changes to methods after pilot trial commencement (such as eligibility criteria), with reasons                                                     | NA                  |
| Participants              | 4a      | Eligibility criteria for participants                                                                                                                        | 5                   |
|                           | 4b      | Settings and locations where the data were collected                                                                                                         | 5                   |
|                           | 4c      | How participants were identified and consented                                                                                                               | 5                   |
| Interventions             | 5       | The interventions for each group with sufficient details to allow replication, including how and when they were actually administered                        | 5–7                 |
| Outcomes                  | 6a      | Completely defined prespecified assessments or measurements to address each pilot trial objective specified in 2b, including how and when they were assessed | 18                  |

|                                                      |     |                                                                                                                                                                                             |       |
|------------------------------------------------------|-----|---------------------------------------------------------------------------------------------------------------------------------------------------------------------------------------------|-------|
|                                                      | 6b  | Any changes to pilot trial assessments or measurements after the pilot trial commenced, with reasons                                                                                        | NA    |
|                                                      | 6c  | If applicable, prespecified criteria used to judge whether, or how, to proceed with future definitive trial                                                                                 | 19–20 |
| Sample size                                          | 7a  | Rationale for numbers in the pilot trial                                                                                                                                                    | 5     |
|                                                      | 7b  | When applicable, explanation of any interim analyses and stopping guidelines                                                                                                                | 19–20 |
| Randomisation:                                       |     |                                                                                                                                                                                             |       |
| Sequence generation                                  | 8a  | Method used to generate the random allocation sequence                                                                                                                                      | 5     |
|                                                      | 8b  | Type of randomisation(s); details of any restriction (such as blocking and block size)                                                                                                      | 5     |
| Allocation concealment mechanism                     | 9   | Mechanism used to implement the random allocation sequence (such as sequentially numbered containers), describing any steps taken to conceal the sequence until interventions were assigned | 5     |
| Implementation                                       | 10  | Who generated the random allocation sequence, who enrolled participants, and who assigned participants to interventions                                                                     | 5     |
| Blinding                                             | 11a | If done, who was blinded after assignment to interventions (for example, participants, care providers, those assessing outcomes) and how                                                    | 4     |
|                                                      | 11b | If relevant, description of the similarity of interventions                                                                                                                                 | NA    |
| Statistical methods                                  | 12  | Methods used to address each pilot trial objective whether qualitative or quantitative                                                                                                      | 20–21 |
| <b>Results</b>                                       |     |                                                                                                                                                                                             |       |
| Participant flow (a diagram is strongly recommended) | 13a | For each group, the numbers of participants who were approached and/or assessed for eligibility, randomly assigned, received intended treatment, and were assessed for each objective       | NA    |
|                                                      | 13b | For each group, losses and exclusions after randomisation, together with reasons                                                                                                            | NA    |
| Recruitment                                          | 14a | Dates defining the periods of recruitment and follow-up                                                                                                                                     | NA    |
|                                                      | 14b | Why the pilot trial ended or was stopped                                                                                                                                                    | NA    |
| Baseline data                                        | 15  | A table showing baseline demographic and clinical characteristics for each group                                                                                                            | NA    |
| Numbers analysed                                     | 16  | For each objective, number of participants (denominator) included in each analysis. If relevant, these numbers should be by randomised group                                                | NA    |

|                          |     |                                                                                                                                                                                |    |
|--------------------------|-----|--------------------------------------------------------------------------------------------------------------------------------------------------------------------------------|----|
| Outcomes and estimation  | 17  | For each objective, results including expressions of uncertainty (such as 95% confidence interval) for any estimates. If relevant, these results should be by randomised group | NA |
| Ancillary analyses       | 18  | Results of any other analyses performed that could be used to inform the future definitive trial                                                                               | NA |
| Harms                    | 19  | All important harms or unintended effects in each group (for specific guidance see CONSORT for harms)                                                                          | NA |
|                          | 19a | If relevant, other important unintended consequences                                                                                                                           | NA |
| <b>Discussion</b>        |     |                                                                                                                                                                                |    |
| Limitations              | 20  | Pilot trial limitations, addressing sources of potential bias and remaining uncertainty about feasibility                                                                      | NA |
| Generalisability         | 21  | Generalisability (applicability) of pilot trial methods and findings to future definitive trial and other studies                                                              | NA |
| Interpretation           | 22  | Interpretation consistent with pilot trial objectives and findings, balancing potential benefits and harms, and considering other relevant evidence                            | NA |
|                          | 22a | Implications for progression from pilot to future definitive trial, including any proposed amendments                                                                          | NA |
| <b>Other information</b> |     |                                                                                                                                                                                |    |
| Registration             | 23  | Registration number for pilot trial and name of trial registry                                                                                                                 | NA |
| Protocol                 | 24  | Where the pilot trial protocol can be accessed, if available                                                                                                                   | NA |
| Funding                  | 25  | Sources of funding and other support (such as supply of drugs), role of funders                                                                                                | NA |
|                          | 26  | Ethical approval or approval by research review committee, confirmed with reference number                                                                                     | 4  |

## Supplementary File S2

**Table 10.** BCTs matching the motivational interviewing, partly adopted from Hardcastle et al., (2017) [41]

| MI Technique            | Example of Technique                                                                 | BCTs from Michie et al.'s (2013) taxonomy        |
|-------------------------|--------------------------------------------------------------------------------------|--------------------------------------------------|
| ENGAGING TECHNIQUES:    |                                                                                      |                                                  |
| Affirmation             | Despite the fact that things didn't go as you had hoped, your intentions were good." | 15.1: Verbal persuasion about capability         |
| FOCUSING TECHNIQUES:    |                                                                                      |                                                  |
| Elicit-Provide Elicit   | "What do you know about type II diabetes? "                                          | 5.1: Information about health consequences       |
| EVOKING TECHNIQUES:     |                                                                                      |                                                  |
| Running Head Start      | "What advantages might a change in lifestyle bring?"                                 | 9.2: Pros and cons                               |
| Looking Forward         | "What may occur if the current situation is maintained?"                             | 9.3: Comparative imagining of future outcomes    |
| Hypothetical thinking   | "What steps would you take if you did decide to alter your behaviour?"               | 15.2: Mental rehearsal of successful performance |
| Query Extremes          | "What do you think would be the BEST outcome from this change?"                      | 5.5: Salience of consequences                    |
| Identify Past Successes | "What have you discovered after trying to change in the past?"                       | 15.3: Focus on past success                      |
| Identify Strengths      | "Tell me about your key strengths?"                                                  | 13.4: Valued self-identity                       |

|                                         |                                                                                                                                                                                                                     |                                   |
|-----------------------------------------|---------------------------------------------------------------------------------------------------------------------------------------------------------------------------------------------------------------------|-----------------------------------|
| Troubleshooting                         | "Imagine supposing there wasn't this one significant roadblock. How might you go about implementing this change if that barrier were removed?"                                                                      | 1.2: Problem-solving              |
| Values Exploration (open or structured) | "What issues are most crucial to you? or "What is your greatest life goal?" How do your eating habits align with your beliefs and goals?"                                                                           | 13.4: Valued self-identity        |
| Reframing                               | Change "I'm unable to do it" to "So, you find it challenging to..."                                                                                                                                                 | 13.2: Framing/reframing           |
| Normalizing                             | "Most people have both positive and negative effects from altering their [target behaviour]" or "Many people report experiencing similar emotions to yours. They try to lose weight, but they have trouble.         | 6.2: Social comparison            |
| PLANNING TECHNIQUES:                    |                                                                                                                                                                                                                     |                                   |
| Explore Change Expectations             | "What would you anticipate happening if you choose that course of action?"                                                                                                                                          | 1.3: Goal setting (outcome)       |
| Consider Change Options                 | "What are the things you could do?"                                                                                                                                                                                 | 1.4: Action planning              |
| Develop a Change Plan                   | What do you intend to do specifically?                                                                                                                                                                              | 1.4: Action planning              |
| Goal attainment Scaling                 | Rate a weight loss goal on a scale ranging from -3 (most unfavourable outcome): gain 5 kg in one month to +3 (most favourable outcome): lose 5 kg in one month where 0 is the status quo (remain at current weight) | 1.5: Review behaviour goal(s)     |
| Support Change/Persistence              | "How may I help you?"                                                                                                                                                                                               | 3.1: Social support (unspecified) |
| Offer Emotional support                 | "I can assume that I would feel the same way if I were going through what you are."                                                                                                                                 | 3.3: Social support (emotional)   |
| Review Outcome goal                     | "How far along are you with your objective?"                                                                                                                                                                        | 1.7: Review outcome goal(s)       |
| Summarise the Plan                      | "So, you are going to do ..."                                                                                                                                                                                       | 1.9: Commitment                   |

## Supplementary File S3

**Table 11.** BCTs matching the *stage of change model*, partly adapted from Moore et al., (2015) [42]

| Stage             | Health coaching Skills to use  | Matched with BCTs                                          |
|-------------------|--------------------------------|------------------------------------------------------------|
| Pre-contemplation | Empathy                        | 3.3: Social support (emotional)                            |
|                   | Sharing                        | 3.1: Social support (unspecified)                          |
|                   | Acceptance                     | 13.4: Valued self-identity                                 |
|                   | Affirming                      | 15.1: Verbal persuasion about capability                   |
|                   | Reframing                      | 13.2: Framing/reframing                                    |
|                   | Sorting barriers               | 1.2: Problem-solving                                       |
| Contemplation     | Affirming                      | 15.1: Verbal persuasion about capability                   |
|                   | Sharing                        | 3.1: Social support (unspecified)                          |
|                   | Brainstorming/Sorting barriers | 1.2: Problem-solving                                       |
|                   | Motivating                     | 10.2: Social reward<br>3.1: Social support (unspecified)   |
|                   | Self-Efficacy and Self-Esteem: |                                                            |
|                   | Verbal persuasion              | 15.1: Verbal persuasion about capability<br>15.4 Self-talk |
|                   | Vicarious experience           | 6.2: Social comparison                                     |
|                   | Committing                     | 1.9: Commitment                                            |
| Preparation       | Identifying steps              | 1.1 Goal setting (behaviour)                               |
|                   | Explore change expectations    | 1.3: Goal setting (outcome)                                |

|             |                                       |                                               |
|-------------|---------------------------------------|-----------------------------------------------|
|             | Identifying potential obstacles       | 1.2: Problem-solving                          |
|             | Values Exploration                    | 13.4: Valued self-identity                    |
| Action      | Having a plan                         | 1.4: Action planning                          |
|             | Reframing                             | 13.2: Framing/reframing                       |
|             | Tracking progress                     | 1.7: Review outcome goal(s)                   |
|             | Normalising                           | 6.2: Social comparison                        |
|             | New network                           | 3.1: Social support (unspecified)             |
|             | Preparing for lapses/facing obstacles | 1.2: Problem-solving                          |
|             | Maintaining the network               | 3.1: Social support (unspecified)             |
| Maintenance | Valuing achievements                  | 9.3: Comparative imagining of future outcomes |
|             | Self-identity                         | 13.1: Identification of self as a role model  |
